# Supplementary material
Source: publisher figshare collection journal article supplement (https://gsapubs.figshare.com/ndownloader/files/23314826)
Supplement: Supplementary file 1 [file 23314826]

## Sheet: Table DR8-1
Data Repository 8 Table 1.
Standard compositions, precision and detection limits for major elements measured on the electron microprobe for the inclusions and olivine host crystals. Precision and detection limits calculated using peak and background count rates and measuring times.
		VG-2 basaltic glass, Juan de Fuca Ridge (NMNH 111240-52)				Scapolite (NMNH R6600)				Olivine, Saint John's (Zabargad) Island, Egypt				Andradite				Inclusions		Olivines
		ref	average	σ%		ref	average	σ%		ref	average	σ%		ref	average	σ%		precision	detection limits	precision	detection limits
		1	n = 34			1	n = 30			2	n = 24				n = 24			%	wt.%	%	wt.%
SiO2		50.81	50.2395	1.00065		49.78	49.5082	0.81672		40.81	40.8656	0.588617		35.9405	36.473	0.743347		0.34175	0.0382726	0.333757	0.0310112
TiO2		1.85	1.82844	3.74502		-	0.0109333	140.15		-	0.003875	117.628		0.0834247	0.052	18.6697		2.12239	0.0673999	7.30806	0.0264404
Al2O3		14.06	13.9634	1.91709		25.05	25.2407	1.60795		-	0.000375	333.888		1.77608	1.75642	5.02954		0.897678	0.0465028	6.88875	0.0151683
FeO		11.84	11.7671	1.64866		0.17	0.0996333	23.3155		9.54	9.49162	1.25033		29.1239	26.8418	0.512256		1.22575	0.0682365	0.417695	0.0236772
MnO		0.22	0.223618	10.6931		-	0.0321667	53.0874		0.120084	0.133	2.63158		0.426105	0.459792	1.43579		6.56324	0.0581656	1.92415	0.00957816
MgO		6.71	6.80435	2.60516		-	0.00956667	88.8474		49.18	49.3177	0.518094		-	0.0562917	26.7576		1.14279	0.0253005	0.333205	0.0284788
NiO		-	0.0121176	115.651		-	0.00706667	140.465		0.360144	0.325	1.83114		-	0.00233333	116.496		6.77238	0.0563627	1.08934	0.00835802
CaO		11.12	11.1235	0.912248		13.58	13.7058	1.19616		0.04	0.000541667	176.588		32.6995	32.894	0.834341		0.502634	0.0251486	1.58967	0.00846659
Na2O		2.62	2.81318	3.79352		5.2	5.41377	2.51883		-	na	-		-	na	-		3.24583	0.0498694	-	-
K2O		0.19	0.207235	13.3926		0.94	0.921733	7.06132		-	na	-		-	na	-		6.13095	0.0522584	-	-
P2O5		0.2	0.2005	9.58322		-	0.00776667	101.092		-	na	-		-	na	-		6.33786	0.0302899	-	-
Cr2O3		-	0.0270588	89.5383		-	0.0105667	147.64		-	na	-		-	na	-		17.5941	0.101168	-	-
SO3		-	0.264147	11.9914		1.32	1.3326	2.89537		-	na	-		-	na	-		5.53005	0.0236625	-	-
Cl		-	0.0264412	21.4959		1.43	1.44757	3.61231		-	na	-		-	na	-		9.44268	0.0146768	-	-
Total		99.62	99.5127			97.47	97.7516			100.038	100.138			100.049	98.5357
na - not analyzed
1 - Jarosewich et al. [1980]
2 - Sweatman and Long [1969]

## Sheet: Table DR8-2
Data Repository 8 Table 2.
Upper K-3 deposit original inclusion and olivine host compositions.
Original inclusions
sample	F01-3C	F01-3C	F01-3C	F01-3C	F01-3C	F01-3C	F01-3C	F01-3C	F01-3C	F01-3C	F01-3C	F01-3C	F01-3C
host crystal	1	1	2	3	4	4	6	7	8	8	9	10	10
inclusion	2	7	1	2	5	6	1	1	1	3	1	1	3
wt.%
n	15	15	14	14	15	14	15	14	14	12	15	15	15
SiO2	53.3843	52.9051	53.6082	53.1913	55.8744	53.8913	53.2567	53.0243	53.4531	53.3095	53.2816	51.9978	51.2421
TiO2	2.91939	2.87625	2.491	2.56944	2.43418	2.62005	2.59066	2.85492	2.70487	2.62014	2.56525	2.56132	2.56606
Al2O3	14.6895	14.7267	14.8273	13.91	15.5569	15.681	15.0654	14.7932	14.6826	14.7708	14.6555	14.2826	14.5326
Fe2O3†	0.967346	0.968178	0.990389	1.01457	0.793423	0.850315	0.819474	0.808344	1.12483	1.08726	0.940597	1.38094	1.39737
FeO	6.38355	6.38904	6.53561	6.69521	5.23582	5.61126	5.40774	5.33429	7.42277	7.17488	6.20703	9.11288	9.22127
MnO	0.110111	0.112087	0.118852	0.106604	0.0955429	0.101055	0.112095	0.100899	0.147143	0.149561	0.0954418	0.163088	0.178324
MgO	5.95592	5.97856	6.18787	6.3671	5.53047	5.73644	6.65424	6.51635	5.10273	4.68197	6.58295	4.88584	4.81802
NiO	0.0313333	0.0294667	0.0274286	0.0259286	0.0352	0.0471429	0.0272	0.0295	0.0244286	0.021	0.0392667	0.0260667	0.0253333
CaO	11.5872	11.7339	11.3119	11.6107	9.23644	9.96438	11.9009	12.4819	11.7679	11.7993	11.3868	11.6441	11.8216
Na2O	2.46272	2.43658	2.55481	2.4533	3.16583	2.97772	2.47213	2.3985	2.21184	2.22293	2.43647	2.24643	2.30429
K2O	0.534253	0.4805	0.440171	0.437614	0.940069	1.04315	0.439169	0.399548	0.316262	0.334176	0.471915	0.429005	0.41043
P2O5	0.290985	0.300571	0.260003	0.2546	0.541667	0.642702	0.293605	0.291921	0.188496	0.315412	0.279785	0.261487	0.242594
Cr2O3	0.0502667	0.0399333	0.0501429	0.0566429	0.0352	0.041	0.0653333	0.056	0.0865714	0.0740833	0.0607333	0.0527333	0.128333
SO3	0.120432	0.129796	0.113948	0.0817362	0.091308	0.116945	0.0947062	0.120767	0.248728	0.259858	0.0928744	0.264247	0.311365
Cl	0.016276	0.0115983	0.00940586	0.0130624	0.00685876	0.0059798	0.0128618	0.0133704	0.0108347	0.0121511	0.0123463	0.0132867	0.0112428
Total	99.5036	99.1182	99.527	98.7878	99.5734	99.3304	99.2121	99.2239	99.493	98.833	99.1086	99.3217	99.211
Mg#	62.4506	62.5193	62.7938	62.8972	65.3125	64.5684	68.686	68.5295	55.0646	53.7725	65.4042	48.8679	48.2234
n	3	2	2	2	2	2	3	4	2	2	2	3	3
H2O wt.%	0.28841	0.236313	0.152763	0.139679	0.110249	0.171293	0.129643	0.123884	0.706781	0.704055	0.166148	0.419046	0.626268
CO2 ppm	nd	nd	nd	nd	nd	nd	nd	nd	nd	nd	nd	nd	119.437
CO2 detection limit ppm	84	57	46	40	120	223	94	21	80	109	188	70	28
Olivine
sample	F01-3C	F01-3C	F01-3C	F01-3C	F01-3C	F01-3C	F01-3C	F01-3C	F01-3C	F01-3C	F01-3C	F01-3C	F01-3C
host crystal	1	1	2	3	4	4	6	7	8	8	9	10	10
wt.%
n	5	5	4	6	5	5	12	11	15	15	8	30	30
SiO2	40.0226	39.5369	39.8907	39.8563	40.1622	40.1622	40.3717	40.2667	40.3957	40.3957	40.1157	40.0765	40.0765
TiO2	0.0114	0.0168	0.01475	0.0223333	0.0212	0.0212	0.0153333	0.0138182	0.0157333	0.0157333	0.01425	0.0169667	0.0169667
Al2O3	0.044	0.0422	0.0475	0.0481667	0.051	0.051	0.0543333	0.0528182	0.0435333	0.0435333	0.046	0.0566333	0.0566333
FeOT	12.8228	13.2444	13.1123	12.7025	11.7412	11.7412	10.512	10.1481	10.4147	10.4147	11.3148	11.0915	11.0915
MnO	0.145088	0.14799	0.15529	0.151161	0.1682	0.1682	0.147461	0.143818	0.1484	0.1484	0.156125	0.140772	0.140772
MgO	46.2242	45.2151	45.7681	45.8758	47.0726	47.0726	47.897	47.9712	47.709	47.709	47.1331	47.0789	47.0789
NiO	0.466012	0.464908	0.45138	0.44167	0.405	0.405	0.451444	0.452455	0.452133	0.452133	0.443625	0.470029	0.470029
CaO	0.213302	0.217917	0.203169	0.222718	0.206	0.206	0.211973	0.207455	0.2074	0.2074	0.2115	0.21045	0.21045
Na2O	na	na	na	na	na	na	na	na	na	na	na	na	na
K2O	na	na	na	na	na	na	na	na	na	na	na	na	na
P2O5	na	na	na	na	na	na	na	na	na	na	na	na	na
Cr2O3	na	na	na	na	na	na	na	na	na	na	na	na	na
Total	99.9494	98.8862	99.6432	99.3206	99.8274	99.8274	99.6612	99.2564	99.3867	99.3867	99.4351	99.1418	99.1418
Fo	86.1534	85.4958	85.7752	86.1555	87.3285	87.3285	88.6485	89.0087	88.7033	88.7033	87.7364	87.9448	87.9448
Mg#	86.5336	85.8867	86.1534	86.5553	87.725	87.725	89.0376	89.3915	89.0899	89.0899	88.1313	88.3263	88.3263
† Fe2O3 calculated using Fe3+/∑Fe = 0.12 [Bezos and Humler, 2005].
na - not analyzed
nd - not detected

## Sheet: Table DR8-3
Data Repository 8 Table3.
Upper K-3 deposit original inclusion and olivine host compositions.
Corrected for post-entrapment crystallization
sample	F01-3C	F01-3C	F01-3C	F01-3C	F01-3C	F01-3C	F01-3C	F01-3C	F01-3C	F01-3C	F01-3C	F01-3C	F01-3C
host crystal	1	1	2	3	4	4	6	7	8	8	9	10	10
inclusion	2	7	1	2	5	6	1	1	1	3	1	1	3
% ol added	2.84517	1.75361	2.00603	2.68779	2.2746	2.98122	2.15296	3.02756	13.244	13.4241	3.43582	16.934	17.3627
wt.%
SiO2	53.0041	52.6707	53.333	52.8329	55.517	53.482	52.9793	52.6381	51.7238	51.5759	52.8292	49.979	49.3035
TiO2	2.83666	2.82611	2.44132	2.50098	2.3793	2.54258	2.53522	2.7689	2.34872	2.27052	2.4776	2.13046	2.12347
Al2O3	14.2728	14.4692	14.5308	13.5374	15.2042	15.2151	14.7422	14.347	12.7438	12.7938	14.1536	11.8736	12.0192
Fe2O3	0.939823	0.9512	0.970522	0.987304	0.775375	0.824965	0.801831	0.783871	0.975855	0.941307	0.90828	1.14709	1.15475
FeO	6.56676	6.50926	6.66755	6.85667	5.38379	5.794	5.51763	5.48003	7.81903	7.6098	6.38252	9.44794	9.54599
MnO	0.111106	0.112716	0.119583	0.107801	0.0971955	0.103057	0.112857	0.102198	0.147309	0.149405	0.0975268	0.159309	0.171804
MgO	7.10162	6.66661	6.98187	7.42901	6.47538	6.96876	7.54218	7.77142	10.7455	10.458	7.97618	12.0308	12.1557
NiO	0.0437007	0.0371026	0.0359332	0.0371028	0.0436115	0.0578114	0.0363338	0.0423052	0.0810736	0.0788758	0.0531597	0.101247	0.102545
CaO	11.2636	11.5319	11.0891	11.3046	9.03103	9.67346	11.6492	12.1103	10.2368	10.2432	11.0028	9.70793	9.80558
Na2O	2.39265	2.39385	2.50356	2.38736	3.09382	2.88895	2.41891	2.32588	1.91891	1.92452	2.35275	1.86602	1.9042
K2O	0.519052	0.472074	0.431341	0.425851	0.918687	1.01206	0.429713	0.387451	0.274377	0.289316	0.455701	0.356358	0.339168
P2O5	0.282706	0.2953	0.254788	0.247757	0.529346	0.623542	0.287284	0.283083	0.163532	0.273071	0.270172	0.217207	0.200473
Cr2O3	0.0488365	0.0392331	0.049137	0.0551204	0.0343993	0.0397777	0.0639267	0.0543046	0.0751059	0.0641383	0.0586466	0.0438035	0.106051
SO3	0.117005	0.12752	0.111663	0.0795393	0.0892311	0.113458	0.0926672	0.117111	0.215787	0.224974	0.0896834	0.219499	0.257303
Cl	0.015813	0.0113949	0.00921718	0.0127113	0.00670275	0.00580153	0.0125849	0.0129656	0.00939972	0.0105199	0.0119221	0.0110367	0.00929071
Total	99.7965	99.3463	99.6791	98.938	99.6869	99.5114	99.3487	99.345	100.092	99.5169	99.2802	99.6394	99.7264
Mg#	65.8442	64.6101	65.1155	65.8862	68.1933	68.1933	70.9018	71.6547	71.0123	71.0123	69.0178	69.4179	69.4179
H2O wt.%	0.280204	0.232169	0.149699	0.135924	0.107741	0.166186	0.126852	0.120133	0.613175	0.609542	0.160439	0.348084	0.517531
CO2 ppm	nd	nd	nd	nd	nd	nd	nd	nd	nd	nd	nd	nd	98.6998
S ppm	468.565	510.671	447.169	318.527	357.339	454.36	371.099	468.987	864.15	900.943	359.15	879.017	1030.41
Cl ppm	158.13	113.949	92.1718	127.113	67.0275	58.0153	125.849	129.656	93.9972	105.199	119.221	110.367	92.9071
nd - not detected
